# Supplementary material
Source: HighWire-hosted journal article supplement (https://jnm.snmjournals.org/highwire/filestream/95139/field_highwire_adjunct_files/0/180802_Supplemental_Data.pdf)
Supplement: 180802_Supplemental_Data.pdf [file 180802_Supplemental_Data.pdf]

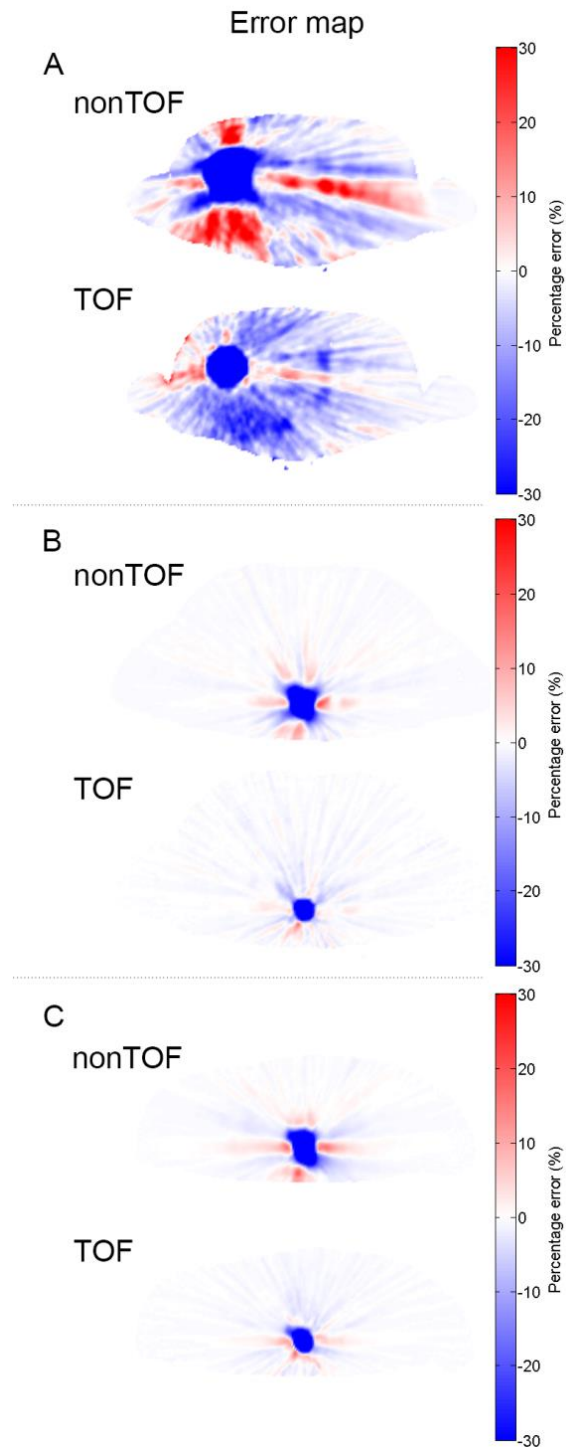

Supplemental Figure 1: Three examples of the percentage error map. A, B and C correspond to the three patient cases in Fig. 2.

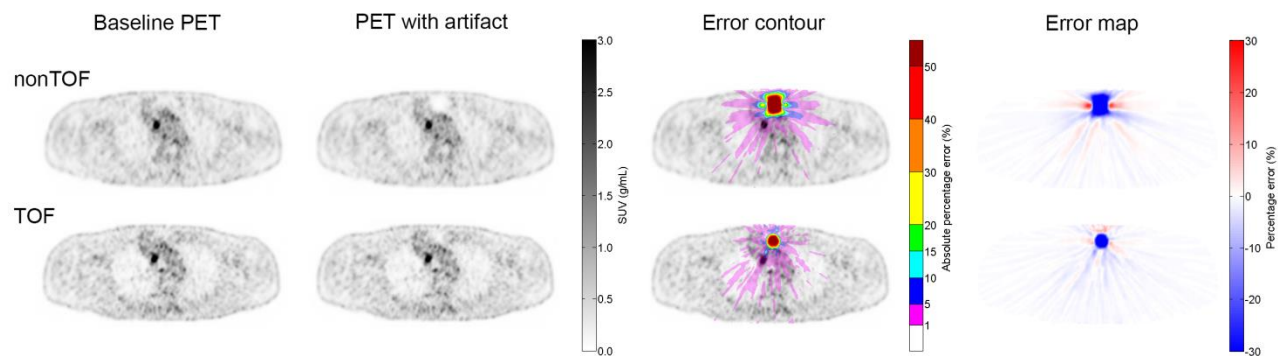

Supplemental Figure 2: Example of a patient with multiple  $^{18}\text{F}$ -FDG avid lesions and a simulated artifact in the sternum. Baseline PET images (first column), PET images reconstructed with a simulated metal artifact in the AC (second column), the absolute percentage error contour plot (third column), and the percentage error map (fourth column).
